# Supplementary material for: Understanding Burnout among Parents of Children with Complex Care Needs: A Scoping Review Followed by a Stakeholder Consultation
Source: Springer Nature journal article supplement (doi:10.1007/s10826-024-02825-y), 2024-04-05
Supplement: MOESM1 [file 26946862]

**Supplement 1**

*The Process of the Stakeholder Consultation*


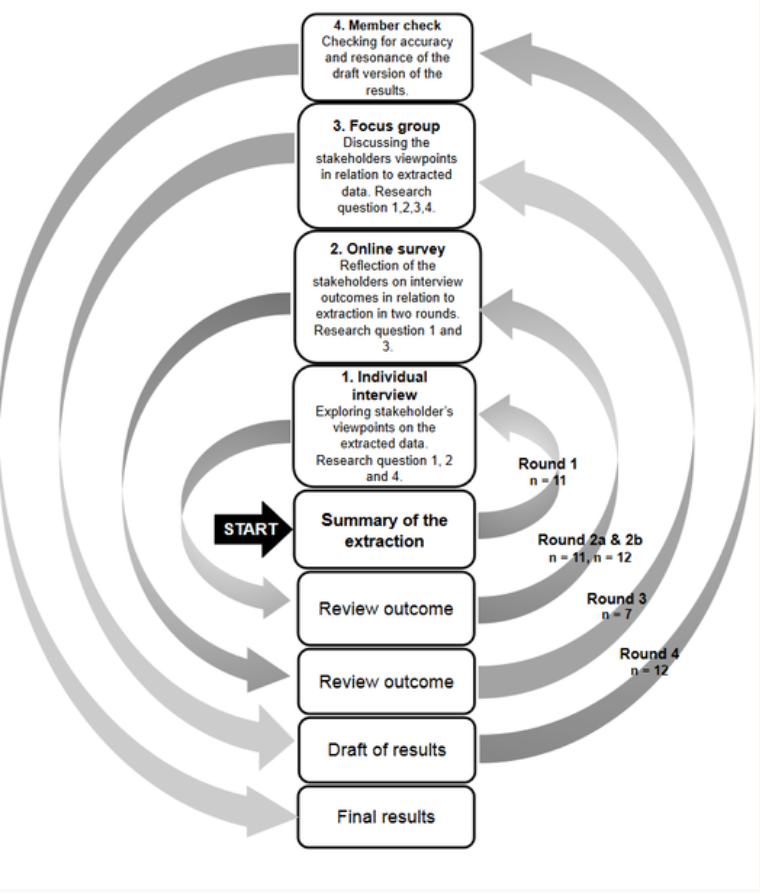


*Note.* The stakeholders were encouraged to partake in four rounds: one individual interview, two online surveys, and one focus group session. The cyclical process promoted the integration of results from the extraction and/ or the outcomes from the previous round. First round and round 2a: n = 4 parents, n = 2 professionals, n = 1 researcher, n = 2 researcher-professional, n = 2 professional-parent; round 2b and 4: n = 1 additional researcher; round 3: n = 4 parents, n = 2 professionals, n = 1 researcher-professional.
