# Supplementary material for: Understanding Burnout among Parents of Children with Complex Care Needs: A Scoping Review Followed by a Stakeholder Consultation
Source: Springer Nature journal article supplement (doi:10.1007/s10826-024-02825-y), 2024-04-05
Supplement: MOESM2 [file 26946862]

**Supplement 2**

*Overview of the Included Articles*

|  | | | | | | | | | Research question investigated | | |
| --- | --- | --- | --- | --- | --- | --- | --- | --- | --- | --- | --- |
| Bibliographic details | Country | Research design | Research methods | Inventory | Sample size respondents (*N*) | Type of respondent | Description of the condition/ disease | Age of the child | 2. Differences | 3. Prevalence | 4. Associated factors |
| Anclair, M., Lappalainen, R., Muotka, J., & Hiltunen, A.J. (2018). Cognitive behavioural therapy and mindfulness for stress and burnout: A waiting list controlled pilot study comparing treatments for parents of children with chronic conditions. *Scandinavian Journal of Caring Science*, 32, 389-396. https://doi.org/10.1111/scs.12473 | Sweden | Quantitative, experimental | Survey / questionnaires | Shirom-Melamed Burnout Questionnaire (SMBQ) | 28 | Mothers, fathers | Somatic/ psych/ both | *M* = 9.8 yrs, *SD* = 4.6, range 1-18 |  |  |  |
| Abdoli, S., Vora, A., Smither, B., Roach, A.D., & Vora, A.C. (2020). I don't have the choice to burnout; experiences of parents of children with type 1 diabetes*. Applied Nursing Research*, *54*,1-6. https://doi.org/10.1016/j.​apnr.2020.151317 | USA | Qualitative | Documents and records | - | 21 | Mothers, fathers | Type 1 diabetes | Range 5-17 yrs |  |  | ✓ |
| Senses Dinc, G., Cop, E., Tos, T., Sari, E., & Senel, S. (2019). Mothers of 0-3-year-old children with Down syndrome: Effects on quality of life. *Pediatrics International*, *61*(9), 865-871. https://doi.org/10.1111/ped.13936 | Turkey | Quantitative, cross-sectional | Survey / questionnaires | Maslach Burnout Inventory (MBI) or a derivative of it | 129 | Mothers | Down syndrome | Down syndrome: *Md =* 6 mths, range 1-36. Control group: *Md* = 7 mths, range 1-36 | ✓ |  | ✓ |
| Gérain, P., & Zech, E. (2018). Does informal caregiving lead to parental burnout? Comparing parents having (or Not) children with mental and physical issues. *Frontiers in Psychology, 9*, 884. https://doi.org/10.3389/fpsyg.2018.00884 | Belgium | Quantitative, cross-sectional | Survey / questionnaires | Parental Burnout Inventory (PBI) | 900 | Parents | Special needs | *M* = 9.04 yrs, *SD* = 6.88, range 0-39 | ✓ |  | ✓ |
| Lindström, C., Åman, J., Norberg, A. L. (2011). Parental burnout in relation to sociodemographic, psychosocial and personality factors as well as disease duration and glycaemic control in children with type 1 diabetes mellitus. *Acta Paediatrica, 100*, 1011-1017. https://doi.org/10.1111/j.1651-2227.2011.02198.x | Sweden | Quantitative, cross-sectional | Survey / questionnaires | Shirom-Melamed Burnout Questionnaire (SMBQ) | 251 | Mothers, fathers | Type 1 diabetes mellitus | n.s. |  | ✓ | ✓ |
| Beheshtipour, N., Nasipour, P., Yektatalab, S., Karimi, M., & Zare, N. (2016). The effect of educational-spiritual Intervention on the burnout of the parents of school age children with cancer: A randomized controlled clinical trial. *International Journal Community Based Nursing and Midwifery, 4*(1), 90–97. | Iran | Quantitative, experimental | Survey / questionnaires | Shirom-Melamed Burnout Questionnaire (SMBQ) | 135 | Mothers, fathers | Cancer | Range 6-12 yrs |  |  |  |
| Lindström, C., Åman, J., Anderzén-Carlsson, A., & Lindahl Norberg, A. (2016). Group intervention for burnout in parents of chronically ill children - a small-scale study. *Scandinavian Journal of Caring Sciences, 30*(4), 678–686. https://doi.org/10.1111/scs.12287 | Sweden | Quantitative, experimental | Survey / questionnaires | Shirom-Melamed Burnout Questionnaire (SMBQ) | 50 | Mothers, fathers | Type 1 diabetes mellitus, inflammatory bowel disease | Range 1-18 yrs |  |  |  |
| Aktan, O., Orakcı, Ş., & Durnalı, M. (2020). Investigation of the relationship between burnout, life satisfaction and quality of life in parents of children with disabilities. *European Journal of Special Needs Education, 35*(5), 679-695. <https://doi.org/10.1080/08856257.2020.1748429> | Turkey | Quantitative, cross-sectional | Survey / questionnaires | Maslach Burnout Inventory (MBI) or a derivative of it | 538 | Mothers, fathers | Disability | n.s. |  |  | ✓ |
| Beheshtipour, N., Nasirpour P., Yektatalab, S., Karimi, M., & Zare, N. (2016). Identifying the effects of education on burnout in parents whose children have cancer and presenting educational-moral pattern for nurses and nursing educators in order to use it in students' education. *International Journal of Medical Research & Health Sciences, 5*(7S), 525-531. | Iran | Quantitative, experimental | Survey / questionnaires | Shirom-Melamed Burnout Questionnaire (SMBQ) | 135 | Mothers, fathers | Cancer | Range 2-6 yrs |  |  |  |
| Norberg, A. L., & Forinder, U. (2016). Different aspects of psychological ill health in a national sample of Swedish parents after successful paediatric stem cell transplantation. *Pediatric Blood & Cancer, 63*(6), 1065–1069. https://doi.org/10.1002/pbc.25908 | Sweden | Quantitative, cross-sectional | Survey / questionnaires | Shirom-Melamed Burnout Questionnaire (SMBQ) | 284 | Mothers, fathers | Children who had undergone hematopoietic stem cell transplantation | *M* = 7.5 yrs, range 0.25–18 |  | ✓ | ✓ |
| Demirhan, E., Içaǧasioǧlu, A., Eriman, E. O., Tezel, C. G., Baklacioǧlu, H. S., Haliloǧlu, S., & Aras, H. (2011). Burnout of primary caregivers of children with cerebral palsy. *Nobel Medicus, 7*(3), 22-27. | Turkey | Quantitative, cross-sectional | Survey / questionnaires | Maslach Burnout Inventory (MBI) or a derivative of it | 115 | Primary caregivers | Cerebral palsy | *M =* 7.84 yrs, SD = 6.29 |  |  | ✓ |
| Norberg A. L. (2010). Parents of children surviving a brain tumor: Burnout and the perceived disease-related influence on everyday life. *Journal of Pediatric Hematology/ Oncology, 32*(7), e285–e289. https://doi.org/10.1097/MPH.0b013e3181e7dda6 | Sweden | Quantitative, longitudinal | Survey / questionnaires | Shirom-Melamed Burnout Questionnaire (SMBQ) | 44 | Mothers, fathers | Brain tumour survivors | Range 5-18 yrs |  |  | ✓ |
| Sairanen, E., Lappalainen, P., & Hiltunen, A. (2018). Psychological inflexibility explains distress in parents whose children have chronic conditions. *PloS One, 13*(7), e0201155. https://doi.org/10.1371/journal.pone.0201155 | Sweden | Quantitative, cross-sectional | Survey / questionnaires | Shirom-Melamed Burnout Questionnaire (SMBQ) | 75 | Mothers, fathers | Chronic conditions | n.s. |  |  | ✓ |
| Lindström, C., Åman, J., Norberg, A. L., Forssberg, M., & Anderzén-Carlsson, A. (2017). "Mission Impossible"; the mothering of a child with type 1 diabetes - from the perspective of mothers experiencing burnout. *Journal of Pediatric Nursing, 36*, 149–156. https://doi.org/10.1016/j.pedn.2017.06.002 | Sweden | Qualitative | Interviews | Shirom-Melamed Burnout Questionnaire (SMBQ) | 21 | Mothers | Type 1 diabetes mellitus | *M =* 10.7 yrs, range 3–17 |  |  | ✓ |
| Weiss M. J. (2002). Hardiness and social support as predictors of stress in mothers of typical children, children with autism, and children with mental retardation. *Autism: The International Journal of Research and Practice, 6*(1), 115–130. https://doi.org/10.1177/1362361302006001009 | USA | Quantitative, cross-sectional | Survey / questionnaires | Maslach Burnout Inventory (MBI) or a derivative of it | 120 | Mothers | Autism and Intellectual disability | Range 2-7 yrs | ✓ |  | ✓ |
| Avieli, H., Smeloy, Y., & Band-Winterstein, T. (2015). Departure scripts and life review of parents living with abusive adult children with mental disorder. *Journal of Aging Studies, 34*, 48–56. https://doi.org/10.1016/j.jaging.2015.04.004 | Israel | Qualitative | Interviews | - | 20 | Mothers, fathers | Mental illness | n.s. |  |  | ✓ |
| Bilgin, S., & Gozum, S. (2009). Reducing burnout in mothers with an intellectually disabled child: An education programme. *Journal of Advanced Nursing, 65*(12), 2552–2561. https://doi.org/10.1111/j.1365-2648.2009.05163.x | Turkey | Quantitative, experimental | Survey / questionnaires | Maslach Burnout Inventory (MBI) or a derivative of it | 90 | Mothers | Intellectual disability | Intervention group: *M =* 8.44 yrs, *SD* = 4.85. Control group: *M =* 8.42 yrs, *SD* = 5.05 |  |  |  |
| Başaran, A., Karadavut, K. I., Uneri, Ş. O., Balbaloglu, O., & Atasoy, N. (2014). Adherence to home exercise program among caregivers of children with cerebral palsy. *Turkish Journal of Physical Medicine and Rehabilitation, 60*(2), 85-91. http://doi:10.5152/tftrd.2014.60973 | Turkey | Quantitative, cross-sectional | Survey / questionnaires | Maslach Burnout Inventory (MBI) or a derivative of it, Adherence survey | 147 | Primary caregivers | Cerebral palsy | Poor adherence group: *M =* 11 yrs, *SD* = 3.8, range 2.5-18. Good adherence group: *M =* 7.4 yrs, *SD* = 4.1, range 2.5-18 |  |  | ✓ |
| Cantwell-Bartl, A. M., & Tibballs, J. (2017). Parenting a child at home with hypoplastic left heart syndrome: Experiences of commitment, of stress, and of love. *Cardiology in The Young, 27*(7), 1341–1348. https://doi.org/10.1017/S1047951117000270 | Australia | Mixed methods | Interviews, Survey / questionnaires | Maslach Burnout Inventory (MBI) or a derivative of it | 29 | Mothers, fathers | Hypoplastic left heart syndrome | *M =* 6.44 yrs, range 1-19 |  | ✓ | ✓ |
| Dürüst, Ç. (2018). The comparison of the fatigue of families with children who have normal and different developments (with the help of teachers). *Journal for Educators, Teachers and Trainers, 9*(2), 24-46. | Cyprus | Quantitative, cross-sectional | Survey / questionnaires | Burnout scale by Pines and Aronson | 240 | Parents | Special needs | > 3 yrs | ✓ |  | ✓ |
| Kahrıman, İ., Polat, S., & Gürol, A. (2019). Determination of perceived social support and burnout levels of mothers of children with intellectual disability. *The Journal of Pediatric Research, 6*(4), 266-279. https//doi.org/10.4274/jpr.galenos.2019.86648 | Turkey | Quantitative, cross-sectional | Interviews, Survey / questionnaires | Maslach Burnout Inventory (MBI) or a derivative of it | 128 | Mothers | Intellectual Disability | *M =* 11.3 yrs, *SD* = 3.88, range 6-14 |  |  | ✓ |
| Karadavut, K. I., & Uneri, S. O. (2011). Burnout, depression and anxiety levels in mothers of infants with brachial plexus injury and the effects of recovery on mothers' mental health. *European Journal of Obstetrics, Gynecology, and Reproductive Biology, 157*(1), 43–47. https://doi.org/10.1016/j.ejogrb.2011.03.001 | Turkey | Quantitative, cross-sectional | Survey / questionnaires | Maslach Burnout Inventory (MBI) or a derivative of it | 18 | Mothers | Perinatal brachial plexus paralysis | < 1 yrs |  |  | ✓ |
| Basaran, A., Karadavut, K. I., Uneri, S. O., Balbaloglu, O., & Atasoy, N. (2013). The effect of having a children with cerebral palsy on quality of life, burn-out, depression and anxiety scores: A comparative study. *European Journal of Physical and Rehabilitation Medicine, 49*(6), 815–822. | Turkey | Quantitative, cross-sectional | Survey / questionnaires | Maslach Burnout Inventory (MBI) or a derivative of it | 203 | Primary caregivers | Cerebral palsy | Range 2-18 yrs | ✓ |  | ✓ |
| Hoag, A. (2014). Mothers’ perceptions of family Communication patterns when having an ADHD Child. In J. H. McCormick & S. L. Blair (Eds.), *Family Relationships and Familial Responses to Health Issues* (pp. 211-246). <https://doi-org.vu-nl.idm.oclc.org/10.1108/S1530-35352014000008A020> | USA | Qualitative | Interviews | - | 9 | Mothers | ADHD | *M =* 9.6 yrs, range 6-13 |  |  | ✓ |
| Manor-Binyamini, I., & Abu-Ajaj O. (2017). Ways of coping and mental burnout of Bedouin mothers compared to Bedouin fathers of children with ASD. *Neuropsychiatry, 07*(01), 61-68. <https://doi.org/10.4172/Neuropsychiatry.1000181> | Israel | Quantitative, cross-sectional | Survey / questionnaires | Mental burnout questionnaire | 148 | Mothers, fathers | Autism spectrum disorder | Range 10-18 yrs |  |  | ✓ |
| Jaramillo, S., Moreno, S., & Rodríguez, V. (2017). Confirmatory factor analysis of the mbi in Colombian parents of children with trisomy 21. *TPM-Testing, Psychometrics, Methodology in Applied Psychology, 24*(2), 285–294. https://doi.org/10.4473/TPM24.2.7 | Colombia | Mixed methods | Survey / questionnaires, interviews | Maslach Burnout Inventory (MBI) or a derivative of it | 209 | Mothers, fathers, clinicians | Down syndrome | n.s. |  |  |  |
| Jaramillo, S., Moreno, S., & Rodríguez, V. (2016). Emotional burden in parents of children with trisomy 21: Descriptive study in a Colombian population. *Universitas Psychologica, 15*(1), 29–38. https://doi.org/10.11144/Javeriana.upsy15-1.ebpc | Colombia | Quantitative, cross-sectional | Survey / questionnaires | Maslach Burnout Inventory (MBI) or a derivative of it | 206 | Mothers, fathers | Down syndrome | *M =* 7.5 yrs, *SD* = 1.9 |  | ✓ | ✓ |
| Sorkkila, M. & Aunola, K. (2019). Risk factors for parental burnout among Finnish parents: The role of socially prescribed perfectionism. *Journal of Child and Family Studies, 29*, 648-659. <https://doi.org/10.1007/s10826-019-01607-1> | Finland | Quantitative, cross-sectional | Survey / questionnaires | Parental Burnout Assessment (PBA) | 1725 | Mothers, fathers | Special needs | n.s. |  |  | ✓ |
| Riva, R., Forinder, U., Arvidson, J., Mellgren, K., Toporski, J., Winiarski, J., & Norberg, A. L. (2014). Patterns of psychological responses in parents of children that underwent stem cell transplantation. *Psycho-oncology, 23*(11), 1307–1313. https://doi.org/10.1002/pon.3567 | Sweden | Quantitative, cross-sectional | Survey / questionnaires | Shirom-Melamed Burnout Questionnaire (SMBQ) | 260 | Mothers, fathers | Children who had undergone hematopoietic stem cell transplantation | *M =* 12.1 yrs, range 1.6-24 |  | ✓ | ✓ |
| Sadziak, A., Wiliński, W. & Wieczorek, M. (2019). Parental burnout as a health determinant in mothers raising disabled children. *Baltic Journal of Health and Physical Activity, 11*(3), 77-89. http://doi.org/ 10.29359/BJHPA.11.3.08 | Poland | Quantitative, cross-sectional | Survey / questionnaires | Parental Burnout Measure (PBM-12) | 80 | Mothers, fathers | Autism, moderate intellectual disability, and mild intellectual disability | Autism: 8-24 yrs, children with mild and moderate intellectual disabilities: 8-15 yrs |  |  | ✓ |
| Lindahl Norberg, A. (2007). Burnout in mothers and fathers of children surviving brain tumour. *Journal of Clinical Psychology in Medical Settings, 14*(2),130-137. <http://dx.doi.org/10.1007/s10880-007-9063-x> | Sweden | Quantitative, cross-sectional | Survey / questionnaires | Shirom-Melamed Burnout Questionnaire (SMBQ) | 303 | Mothers, fathers | Brain tumour survivors | *M =* 11 yrs, range 5-18 | ✓ | ✓ | ✓ |
| Polat, H. & Karakas, S. A. (2019). An examination of the perceived social support, burnout levels and child-raising attitudes of mothers of children diagnosed with attention deficit hyperactivity disorder in Turkey. *International Journal of Caring Sciences, 12*(2), 1165- 1174. | Turkey | Quantitative, cross-sectional | Survey / questionnaires | Maslach Burnout Inventory (MBI) or a derivative of it | 159 | Mothers | ADHD | Range 6-16 yrs |  |  | ✓ |
| Sairanen, E., Lappalainen, R., Lappalainen, P., Kapainen, K., Carlstedt, F., Anclair, M. & Hiltunen, A. (2019). Effectiveness of a web-based acceptance and commitment therapy intervention for wellbeing of parents whose children have chronic conditions: A randomized controlled trial. *Journal of Contextual Behavioral Science, 13*, 94-102. https://doi.org/10.1016/j.jcbs.2019.07.004 | Sweden | Quantitative, experimental | Survey / questionnaires | Shirom-Melamed Burnout Questionnaire (SMBQ) | 74 | Parents | Type 1 diabetes or functional disability | ACT group: *M =* 11.0 yrs, *SD* = 4.6. Control group: *M =* 9.6 yrs, *SD* = 4.5 |  |  | ✓ |
| Nakigudde, J., Mutamba, B. B., Bazeyo, W., Musisi, S., & James, O. (2016). An exploration of caregiver burden for children with nodding syndrome (lucluc) in northern Uganda. *BMC psychiatry, 16*, 255. https://doi.org/10.1186/s12888-016-0955-x | Uganda | Qualitative | Interviews, Focus group | - | 54 | Primary caregivers | Nodding syndrome | *M =* 14.16 yrs, *SD* = 2.4, range 6-18 |  |  |  |
| Unal Yuksekgonul, A., Aslan, A. T., Sismanlar Eyuboglu, T., Soysal, S. & Budakoglu, I. I. (2020). Evaluation of the psychological status of mothers of children with cystic fibrosis and the relationship between children’s clinical status. *Journal of Paediatrics and Child Health, 56(*10), 1537-1543. https://doi.org/10.1111/jpc.14983 | Turkey | Quantitative, cross-sectional | Survey / questionnaires | Maslach Burnout Inventory (MBI) or a derivative of it | 36 | Mothers | Cystic fibrosis | *M =* 79.6 mths, *SD* = 9.1 |  |  | ✓ |
| Sekułowicz, M., Boroń-Krupińska, K., Kwiatkowski, P., Latawiec, B. M. (2019). Sense of coherence, resilience and coping as correlates of burnout of parents of children with disabilities: The new burnout screening instrument. *Niepełnosprawność, 36*, 254-268. <https://doi.org/10.4467/25439561.NP.19.058.12301> | Poland | Quantitative, cross-sectional | Survey / questionnaires | Parental Burnout Measure (PBM-12) | 87 | Mothers | Cerebral palsy, autism or other disability | *M =* 6.81 yrs, *SD* = 4.03, range 1.5-24 |  |  | ✓ |
| Lindahl Norberg, A., Mellgren, K., Winiarski, J., & Forinder, U. (2014). Relationship between problems related to child late effects and parent burnout after pediatric hematopoietic stem cell transplantation. *Pediatric Transplantation*, *18*(3), 302–309. https://doi.org/10.1111/petr.12228 | Sweden | Quantitative, cross-sectional | Survey / questionnaires | Shirom-Melamed Burnout Questionnaire (SMBQ) | 685 | Mothers, fathers | Children who had undergone hematopoietic stem cell transplantation | n.s. | ✓ | ✓ | ✓ |
| Vinayak, S. & Dhanoa, S. K. (2017). Relationship of parental burnout with parental stress and personality among parents of neonates with hyperbilirubinemia. *The International Journal of Indian Psychology, 4*(2), 102-111. | India | Quantitative, cross-sectional | Survey / questionnaires | Maslach Burnout Inventory (MBI) or a derivative of it | 200 | Mothers, fathers | Neonates with hyperbilirubinemia | Range 35-38 weeks |  |  | ✓ |
| Nasir, A. M. (2019). Determination of parents burnout for child with type 1 diabetes mellitus in endocrine and diabetes center at Al-Nasiriyah city. *Journal of Global Pharma Technology, 11*(03), 565-569. | Iraq | Quantitative, cross-sectional | Survey / questionnaires | Maslach Burnout Inventory (MBI) or a derivative of it | 200 | Mothers, fathers | Type 1 diabetes mellitus | n.s. |  | ✓ | ✓ |
| van't Hooft, I., & Norberg, A. L. (2010). SMART cognitive training combined with a parental coaching programme for three children treated for medulloblastoma. *NeuroRehabilitation, 26*(2), 105–113. https://doi.org/10.3233/NRE-2010-0541 | Sweden | Quantitative, experimental | Survey / questionnaires | Shirom-Melamed Burnout Questionnaire (SMBQ) | 6 | Mothers, fathers | Children that had been treated for the medulloblastoma | *M =* 11.67 yrs, range 9-14 |  |  |  |
| Wancata, J., Freidl, M., Krautgartner, M., Friedrich, F., Matschnig, T., Unger, A., Gössler, R., & Frühwald, S. (2008). Gender aspects of parents' needs of schizophrenia patients. *Social Psychiatry and Psychiatric Epidemiology, 43*(12), 968–974. https://doi.org/10.1007/s00127-008-0391-4 | Austria | Quantitative, cross-sectional | Survey / questionnaires | Carer's needs assessment- schizophrenia (CNA-S) | 202 | Mothers, fathers | Schizophrenia | n.s. |  | ✓ | ✓ |
| Puckett, A.C. (1985). *The effectiveness of a brief, focused, educational intervention on measured levels of stress and burnout in parents of children with cancer* (Unpublished doctoral dissertation) The University of North Carolina at Chapel Hill, North Carolina. | USA | Quantitative, experimental | Survey / questionnaires | Maslach Burnout Inventory (MBI) or a derivative of it | 58 | Parents | Cancer | n.s. |  |  | ✓ |
| Gokcen, C., Coskun, S., & Kutuk, M. O. (2018). Comparison of depression and burnout levels of mothers of children with attention-deficit hyperactivity disorder before and after treatment. *Journal of Child and Adolescent Psychopharmacology, 28*(5), 350–353. https://doi.org/10.1089/cap.2017.0050 | Turkey | Quantitative, experimental | Survey / questionnaires | Maslach Burnout Inventory (MBI) or a derivative of it | 40 | Mothers | ADHD | *M =* 6.80 yrs, *SD* = 1.43 |  |  |  |
| Lindström, C., Åman, J., & Norberg, A. L. (2010). Increased prevalence of burnout symptoms in parents of chronically ill children. *Acta Paediatrica, 99*(3), 427–432. https://doi.org/10.1111/j.1651-2227.2009.01586.x | Sweden | Quantitative, cross-sectional | Survey / questionnaires | Shirom-Melamed Burnout Questionnaire (SMBQ),  Karolinska Exhaustion Scale | 413 | Mothers, fathers | Type 1 diabetes mellitus, inflammatory bowel disease | n.s. | ✓ | ✓ |  |
| Naeem, F., Arif, S., Asghar, A. & Mahmood, Z. (2018). Psychosocial stressors, burnout and mental health problems in caregivers of children with cerebral palsy. *Journal of Postgraduate Medical Institute, 32*(4), 372-377. | Pakistan | Quantitative, cross-sectional | Survey / questionnaires | Caregiver burnout scale | 93 | Mothers | Cerebral palsy | n.s. |  |  | ✓ |
| Koydemir-Özden, S. & Tosun, Ü. (2010). A qualitative approach to understanding Turkish mothers of children with autism: Implications for counselling. *Australian Journal of Guidance & Counselling, 20*(1), 55-68. | Turkey | Qualitative | Interviews | - | 13 | Mothers | Autism | Range 7-14 yrs |  |  | ✓ |
| Kurtoğlu, H. H. & Özçirpici, B. (2019). A comparison of family attention and burnout in families of children with disabilities and families of children without disabilities. *Turkiye Klinikleri Journal of Medical Sciences, 39*(4), 362-74. https://doi.org/10.5336/medsci.2018-62949 | Turkey | Quantitative, cross-sectional | Survey / questionnaires, open ended questions about "worry about childs future" | Maslach Burnout Inventory (MBI) or a derivative of it | 194 | Mothers | Intellectual disability and/or physical disability | *M =* 5.71 yrs, *SD* = 3.91, range 1-24 | ✓ |  | ✓ |
| Kwiatkowski, P. & Sekułowicz, M. (2017). Examining the relationship of individual resources and burnout in mothers of children with disabilities. *International Journal of Special Education, 32*(4), 823-841. | Poland | Quantitative, cross-sectional | Survey / questionnaires | Parental Burnout Measure (PBM-12) | 69 | Mothers | Autism spectrum disorder and cerebral palsy | *M =* 6.48 yrs, *SD* = 3.44 |  |  | ✓ |
| Anclair, M. & Hiltunen, A. J. (2014). Cognitive behavioral therapy for stress-related problems: Two single-case studies of parents of children with disabilities. *Clinical Case Studies, 13*(6), 472–486. https://doi.org/10.1177/1534650114522090 | Sweden | Mixed methods | Survey / questionnaire, interviews | Shirom-Melamed Burnout Questionnaire (SMBQ) | 2 | Mothers | Autism or Asperger syndrome | Child 1: 12 yrs, child 2: 16 yrs |  |  | ✓ |
| Dimitropoulos, G., Freeman, V. E., Lock, J. & Le Grange, D. (2017). Clinician perspective on parental empowerment in family-based treatment for adolescent anorexia nervosa. *Journal of Family Therapy, 39(4)*, 537–562. https://doi.org/10.1111/1467-6427.12086 | Canada | Qualitative | Interviews, Focus groups | - | 30 | Clinicians | Anorexia nervosa and bulimia nervosa | n.s. |  |  |  |
| Rehm, R. S., Fisher, L. T., Fuentes-Afflick, E., & Chesla, C. A. (2013). Parental advocacy styles for special education students during the transition to adulthood. *Qualitative Health Research, 23*(10), 1377–1387. https://doi.org/10.1177/1049732313505915 | USA | Qualitative | Interviews | - | 97 | Parents, teachers | Chronic physical health condition and a developmental disability | Range 14-26 yrs |  |  |  |
| Salmon, N. & Kinnealey, M. (2007). Paving rough roads: Transition to life beyond the classroom as experienced by students with disabilities and their families. *Exceptional Education Canada, 17*(1), 53-83. | Canada | Qualitative | Interviews | - | 11 | Mothers, fathers | Disabilities | *M =* 18.4 yrs, range 16-20 |  |  | ✓ |
| Sairanen, E., Lappalainen, R. Lappalainen, P. & Hiltunen, A. (2020). Mediators of change in online acceptance and commitment therapy for psychological symptoms of parents of children with chronic conditions: An investigation of change processes. *Journal of Contextual Behavioral Science,15*, 123–130. https://doi.org/10.1016/j.jcbs.2019.11.010 | Sweden | Quantitative, experimental | Survey / questionnaires | Shirom-Melamed Burnout Questionnaire (SMBQ) | 74 | Mothers, fathers | Type 1 diabetes or functional disabilities | n.s. |  |  | ✓ |
| Donohue, P. K., Williams, E. P., Wright-Sexton, L., & Boss, R. D. (2018). "It's relentless": Providers' experience of pediatric chronic critical illness. *Journal of Palliative Medicine, 21(7)*, 940–946. <https://doi.org/10.1089/jpm.2017.0397> | USA | Qualitative | Interviews | - | 44 | Clinicians | Chronic critical illness | n.s. |  |  | ✓ |
| Varghese, R. T. & Venkatesan, S. (2013). A comparative study of maternal burnout in autism and hearing impairment. *International Journal of Psychology and Psychiatry, 1*(2), 101-108. https://doi.org/10.5958/j.2320-6233.1.2.016 | India | Quantitative, cross-sectional | Survey / questionnaires | Maternal Burnout Scale (MB-35) | 60 | Mothers | Autism or hearing impairment | n.s. |  |  | ✓ |
| Nichols, M. A. (2018). *Fathers of children with autism spectrum disorders: Understanding stress, coping, and opportunities for growth* (Unpublished doctoral dissertation). Florida State University, Florida. | USA | Qualitative | Interviews, Survey / questionnaires | - | 5 | Fathers | Autism spectrum disorders | *M =* 16 yrs, range 14-17 |  |  | ✓ |
| Aydogan, D. & Kizildag, S. (2017). Examination of relational resilience with couple burnout and spousal support in families with a disabled child. *The Family Journal: Counseling and Therapy for Couples and Families, 25*(4), 407-413. [https://doi-org.vu-nl.idm.oclc.org/10.1177/1066480717731215](https://doi-org.vu-nl.idm.oclc.org/10.1177%2F1066480717731215) | Turkey | Quantitative, cross-sectional | Survey / questionnaires | Couple Burnout Scale (CBS) | 233 | Parents | Disability | n.s. |  |  | ✓ |

*Note.* All studies answered the first research question on conceptualization
